# Supplementary material for: Diamond functionalization with light-harvesting molecular wires: improved surface coverage by optimized Suzuki cross-coupling conditions
Source: Royal Society of Chemistry journal article supplement (doi:10.1039/c4ra04740k), 2014-01-01
Supplement: c4ra04740k1.pdf [file c4ra04740k1.pdf]

## Supplementary Information

### **Diamond functionalization with light-harvesting molecular wires: improved surface coverage by optimized Suzuki cross-coupling conditions**

W.S. Yeap,<sup>1\*</sup> D. Bevk,<sup>1,2</sup> X. Liu,<sup>3</sup> H. Krysova,<sup>4</sup> A. Pasquarelli,<sup>5</sup> D. Vanderzande,<sup>1,2</sup> L. Lutsen,<sup>1,2</sup> L. Kavan,<sup>4</sup> M. Fahlman,<sup>3</sup> W. Maes,<sup>1,2</sup> and K. Haenen<sup>1,2\*</sup>

<sup>1</sup> Hasselt University, Institute for Materials Research (IMO), B-3590 Diepenbeek, Belgium

<sup>2</sup> IMEC vzw, IMOMEK, B-3590 Diepenbeek, Belgium

<sup>3</sup> Linköping University, Department of Physics, Chemistry and Biology, S-58183 Linköping, Sweden

<sup>4</sup> Academy of Sciences of the Czech Republic, J. Heyrovský Institute of Physical Chemistry, v.v.i., Dolejškova 3, CZ-182 23 Prague 8, Czech Republic

<sup>5</sup> Ulm University, Institute of Electron Devices and Circuits, 89069 Ulm, Germany

\* To whom correspondence should be addressed.

Tel. : +32 11 26 8826; fax: +32 11 26 8899

E-mail address: wengsiang.yeap@uhasselt.be (W.S. Yeap)

E-mail address: ken.haenen@uhasselt.be (K. Haenen)

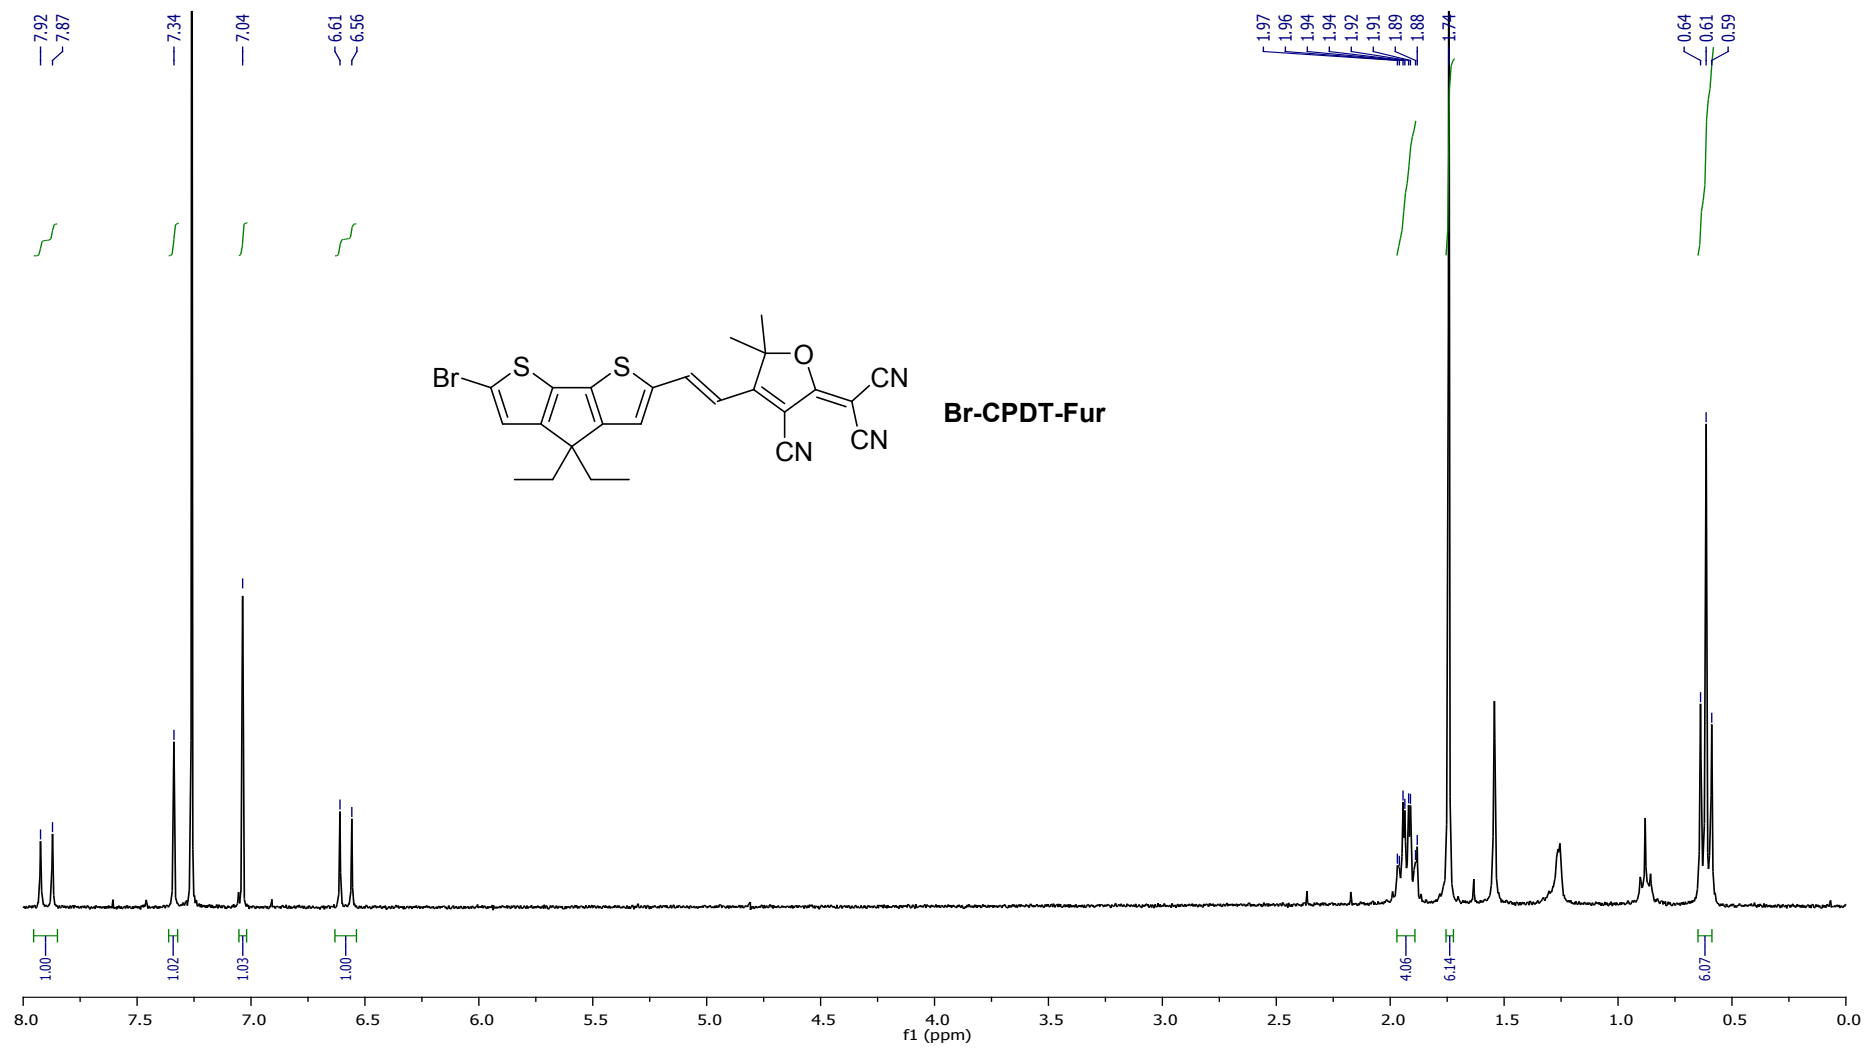

Fig. S1 <sup>1</sup>H NMR spectrum of Br-CPDT-Fur.

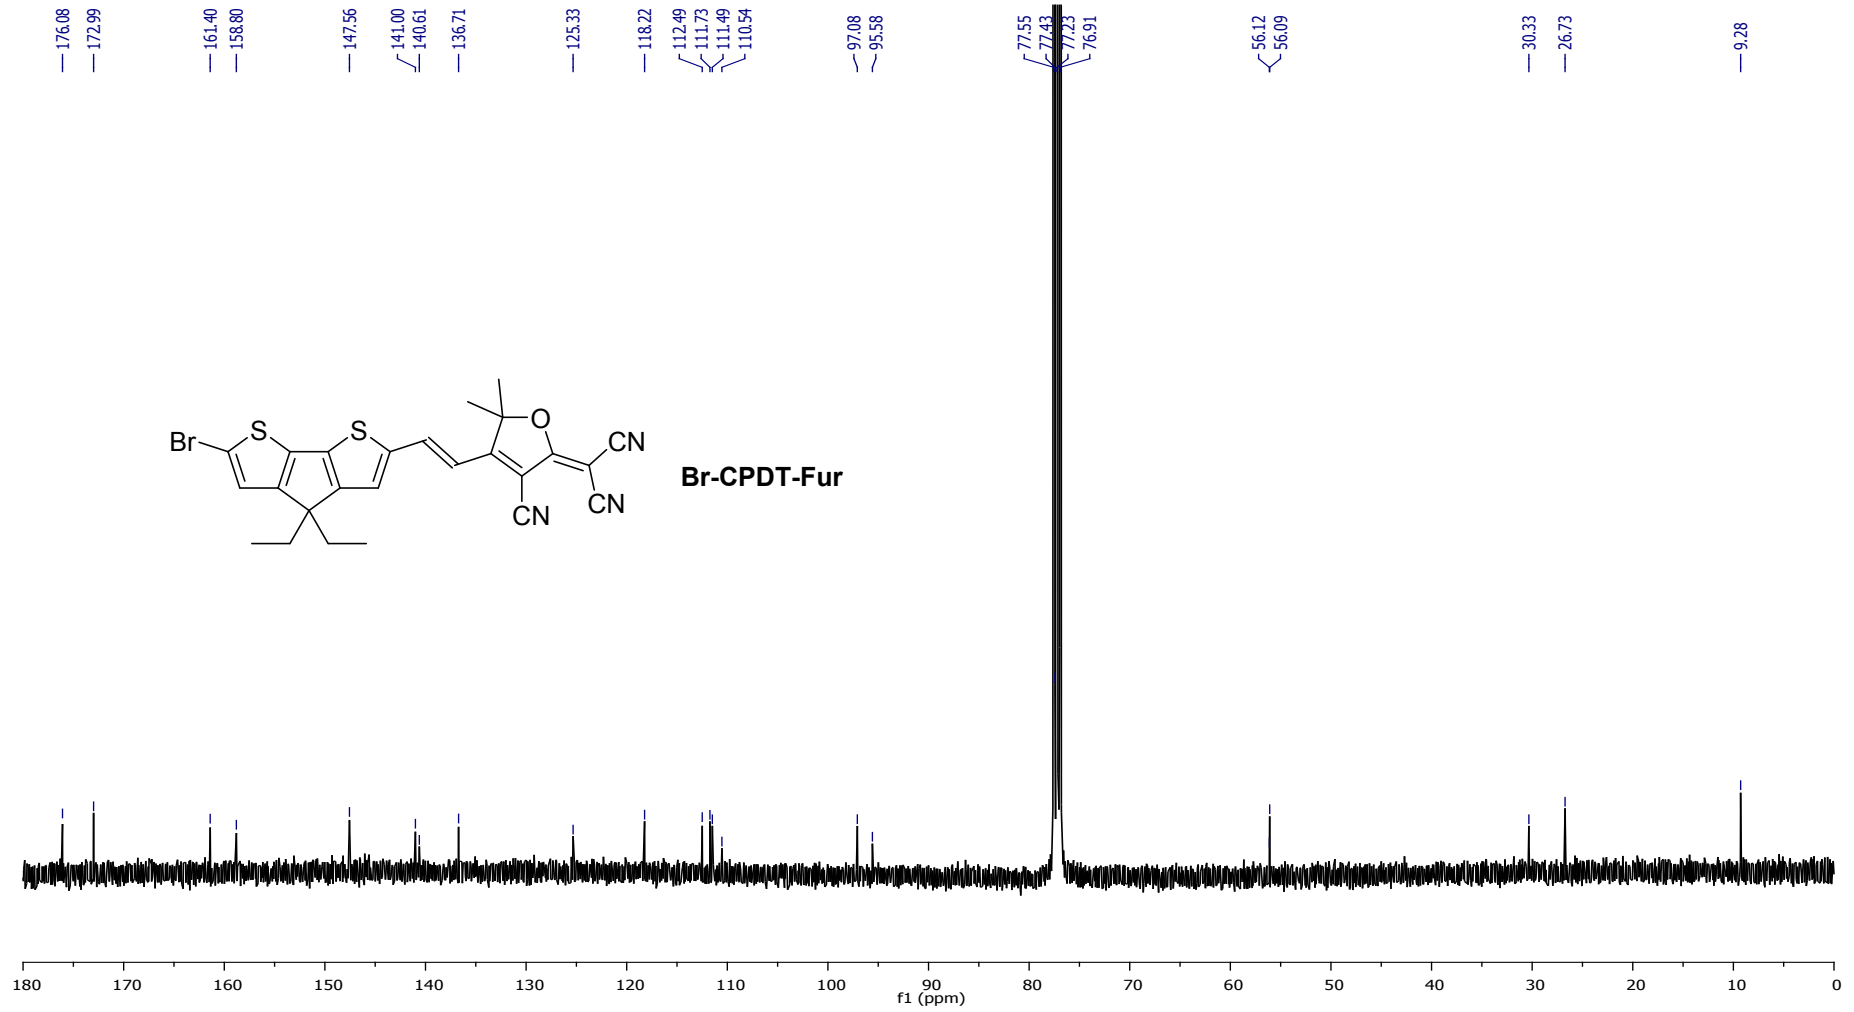

Fig. S2 <sup>13</sup>C NMR spectrum of Br-CPDT-Fur.

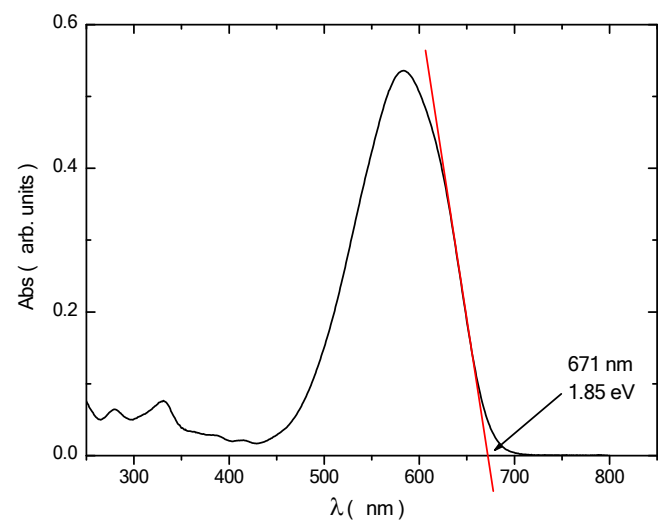

**Fig. S3** UV-Vis absorption spectrum of **Br-CPDT-Fur** in CH<sub>2</sub>Cl<sub>2</sub> solution.
